# Supplementary material for: A GFP-Tagged Gross Deletion on Chromosome 1 Causes Malignant Peripheral Nerve Sheath Tumors and Carcinomas in Zebrafish
Source: PubMed Central journal article supplement (PMC4687860; doi:10.1371/journal.pone.0145178), 2015-12-22
Supplement: pone.0145178.s003.pdf [file pone.0145178.s003.pdf]

|    | GENE              | PRODUCT                                                             | Mb    |
|----|-------------------|---------------------------------------------------------------------|-------|
| 1  | tim10             | mitochondrial import inner membrane translocase subunit Tim10       | 43,69 |
| 2  | unc93b1           | protein unc-93 homolog B1                                           | 43,69 |
| 3  | cryba1l2          | crystallin beta A1 like 2                                           | 43,72 |
| 4  | crybb1 l2         | crystallin beta B1 like 2                                           | 43,74 |
| 5  | rtn4rl2a          | reticulon 4 receptor-like 2 a precursor                             | 43,79 |
| 6  | zdhhc5a           | zinc finger DHHC-type containing 5a                                 | 43,84 |
| 7  | tmx2b             | thioredoxin-related transmembrane protein 2-B precursor             | 43,87 |
| 8  | med19b            | mediator of RNA polymerase II transcription subunit 19-B            | 43,88 |
| 9  | slc43a1b          | large neutral amino acids transporter small subunit 3               | 43,89 |
| 10 | si:dkey-28b4.7    | DNA polymerase subunit delta-4                                      | 44,01 |
| 11 | p2rx3b            | P2X purinoceptor 3                                                  | 44,04 |
| 12 | si:dkey-9i23.4    | uncharacterized protein LOC571855 precursor                         | 44,07 |
| 13 | si:dkey-9i23.5    | uncharacterized protein LOC571862 precursor                         | 44,08 |
| 14 | ndufs8a           | NADH dehydrogenase [ubiquinone] iron-sulfur protein 8 mitochondrial | 44,11 |
| 15 | zgc:165520        | uncharacterized protein LOC571872                                   | 44,13 |
| 16 | kdm2aa            | lysine (K)-specific demethylase 2B                                  | 44,14 |
| 17 | si:dkey-9i23.15   | uncharacterized protein LOC555790 precursor                         | 44,22 |
| 18 | tmem176           | transmembrane protein 176                                           | 44,23 |
| 19 | si:dkey-9i23.16   | uncharacterized protein LOC571915                                   | 44,24 |
| 20 | vps37c            | vacuolar protein sorting-associated protein 37C                     | 44,25 |
| 21 | dnaja1l           | dnaJ homolog subfamily A member 1                                   | 44,30 |
| 22 | rps6              | 40S ribosomal protein S6                                            | 44,34 |
| 23 | zgc:56382         | uncharacterized protein LOC406670 precursor                         | 44,47 |
| 24 | zgc:111983        | uncharacterized protein LOC550501 precursor                         | 44,47 |
| 25 | ddx39aa           | DEAD (Asp-Glu-Ala-Asp) box polypeptide 39Aa                         | 44,50 |
| 26 | emp1              | epithelial membrane protein 1                                       | 44,63 |
| 27 | zgc:101679        | factor VIII intron 22 protein                                       | 44,64 |
| 28 | si:ch211-243a20.3 | uncharacterized protein LOC100151507 precursor                      | 44,66 |
| 29 | grin2bb           | glutamate [NMDA] receptor subunit epsilon-2                         | 44,68 |
| 30 | atf7ip            | activating transcription factor 7-interacting protein 1             | 44,88 |
| 31 | sept3             | neuronal-specific septin-3                                          | 44,93 |
| 32 | serhl             | serine hydrolase-like protein                                       | 44,96 |
| 33 | trappc5           | trafficking protein particle complex subunit 5                      | 44,97 |
| 34 | mcoln1            | mucolin 1                                                           | 44,98 |
| 35 | si:ch211-214c7.5  | UPF0575 protein C19orf67 homolog                                    | 45,05 |
| 36 | map2k7            | dual specificity mitogen-activated protein kinase kinase 7          | 45,15 |
| 37 | lipt1             | lipoyltransferase 1 mitochondrial                                   | 45,23 |
| 38 | arhgef7b          | Rho guanine nucleotide exchange factor (GEF) 7b                     | 45,27 |
| 39 | sox1b             | transcription factor Sox-1b                                         | 45,50 |
| 40 | tubgcp            | gamma-tubulin complex component 3                                   | 45,71 |
| 41 | si:busm1-105i16.2 | uncharacterized protein LOC368709 isoform 2                         | 45,81 |
| 42 | zgc:174719        | uncharacterized protein LOC100137112                                | 45,81 |
| 43 | cab39l            | calcium-binding protein 39-like                                     | 45,91 |
| 44 | cdadc1            | cytidine and dCMP deaminase domain-containing protein 1             | 45,93 |
| 45 | rcbtb1            | RCC1 and BTB domain-containing protein 1                            | 45,94 |
| 46 | arl1l             | ADP-ribosylation factor-like protein 11                             | 45,96 |
| 47 | ebpl              | emopamil-binding protein-like                                       | 45,97 |
| 48 | kpna3             | importin subunit alpha-3                                            | 45,98 |
| 49 | spryd7a           | chromosome 13 open reading frame 1                                  | 46,02 |
| 50 | mir16b            | microRNA                                                            | 46,03 |
| 51 | mir15a-1          | microRNA                                                            | 46,03 |
| 52 | si:ch73-160h15.3  | leukemia-associated protein 7                                       | 46,14 |
| 53 | agpat3            | 1-acyl-sn-glycerol-3-phosphate acyltransferase gamma                | 46,15 |
| 54 | pdxkb             | pyridoxal kinase                                                    | 46,20 |
| 55 | itsn1             | intersectin-1                                                       | 46,31 |
| 56 | cryz1l            | quinone oxidoreductase-like protein 1                               | 46,40 |
| 57 | setd4             | SET domain-containing protein 4                                     | 46,42 |
| 58 | zgc:162351        | uncharacterized protein LOC100038770 precursor                      | 46,43 |
| 59 | si:ch211-287j19.6 | uncharacterized protein LOC565708 precursor                         | 46,43 |
| 60 | mhc1zda           | major histocompatibility complex class I ZDA precursor              | 46,43 |
| 61 | zgc:136614        | uncharacterized protein LOC664757 precursor                         | 46,45 |

|     |                   |                                                                                |       |
|-----|-------------------|--------------------------------------------------------------------------------|-------|
| 62  | zgc:111893        | uncharacterized protein LOC556341 precursor                                    | 46,45 |
| 63  | mhc1zba           | major histocompatibility complex class I ZE like precursor                     | 46,46 |
| 64  | mhc1zha           | major histocompatibility complex class I ZHA precursor                         | 46,47 |
| 65  | cbr1              | carbonyl reductase [NADPH] 1                                                   | 46,47 |
| 66  | more3b            | MORC family CW-type zinc finger 3b                                             | 46,49 |
| 67  | bcl9              | B-cell CLL/lymphoma 9 protein                                                  | 46,70 |
| 68  | cx41.8            | connexin 41.8                                                                  | 46,72 |
| 69  | cx44.1            | gap junction alpha-8 protein                                                   | 46,75 |
| 70  | fstl1a            | follistatin-like 1a precursor                                                  | 46,77 |
| 71  | lrcc58a           | leucine rich repeat containing 58                                              | 46,79 |
| 72  | obfc1             | CST complex subunit STN1                                                       | 46,81 |
| 73  | sh3pxd2aa         | SH3 and PX domain-containing protein 2A                                        | 46,89 |
| 74  | neur11aa          | E3 ubiquitin-protein ligase NEURL1                                             | 47,01 |
| 75  | cfap58            | coiled-coil domain-containing protein 147                                      | 47,14 |
| 76  | cxcl18b           | chemokine (C-X-C motif) ligand 18b precursor                                   | 48,58 |
| 77  | msxb              | homeobox protein MSH-B                                                         | 48,71 |
| 78  | si:dkeyp-80c12.7  | uncharacterized protein LOC557882                                              | 48,73 |
| 79  | taf5              | transcription initiation factor TFIID subunit 5                                | 48,77 |
| 80  | si:dkeyp-80c12.10 | up-regulated during skeletal muscle growth protein 5                           | 48,79 |
| 81  | pdc11             | protein RRP5 homolog                                                           | 48,79 |
| 82  | zgc:175214        | ring finger protein 122-like                                                   | 48,84 |
| 83  | si:ch211-281g13.5 | probable E3 ubiquitin-protein ligase HERC4-like                                | 48,88 |
| 84  | zgc:163136        | uncharacterized protein LOC100073325                                           | 48,89 |
| 85  | si:ch211-281g13.4 | si:ch211-281g13.4                                                              | 48,90 |
| 86  | col17a1a          | collagen type XVII alpha 1a                                                    | 48,92 |
| 87  | slkb              | non-coding RNA                                                                 | 48,96 |
| 88  | tsga10            | testis-specific gene 10 protein                                                | 49,01 |
| 89  | lef1              | lymphoid enhancer-binding factor 1                                             | 49,17 |
| 90  | hadh              | hydroxyacyl-coenzyme A dehydrogenase mitochondrial                             | 49,27 |
| 91  | cyp2u1            | cytochrome P450 2U1                                                            | 49,28 |
| 92  | sgms2             | phosphatidylcholine:ceramide cholinephosphotransferase 2                       | 49,29 |
| 93  | gstcd             | glutathione S-transferase C-terminal domain-containing protein                 | 49,31 |
| 94  | npnt              | nephronectin precursor                                                         | 49,44 |
| 95  | tbck              | TBC domain-containing protein kinase-like protein                              | 49,55 |
| 96  | aimp1             | aminoacyl tRNA synthase complex-interacting multifunctional protein 1          | 49,65 |
| 97  | dkk2              | dickkopf-related protein 2 precursor                                           | 49,75 |
| 98  | papss1            | bifunctional 3'-phosphoadenosine 5'-phosphosulfate synthase 1                  | 49,84 |
| 99  | pkd2              | polycystin-2                                                                   | 49,90 |
| 100 | abcg2d            | ATP-binding cassette sub-family G member 2                                     | 49,92 |
| 101 | ppm1k             | protein phosphatase 1K (PP2C domain containing)                                | 49,95 |
| 102 | herc3             | probable E3 ubiquitin-protein ligase HERC3                                     | 50,00 |
| 103 | zgc:154142        | uncharacterized protein LOC555481                                              | 50,15 |
| 104 | otx1a             | homeobox protein OTX1 A                                                        | 50,28 |
| 105 | mdh1aa            | malate dehydrogenase 1Aa NAD (soluble)                                         | 50,33 |
| 106 | mdh1aa            | malate dehydrogenase 1Aa NAD (soluble)                                         | 50,33 |
| 107 | mdh1aa            | malate dehydrogenase 1Aa NAD (soluble)                                         | 50,33 |
| 108 | ugp2a             | UDP-glucose pyrophosphorylase 2a                                               | 50,35 |
| 109 | spast             | spastin                                                                        | 50,38 |
| 110 | dpy30             | non-coding RNA                                                                 | 50,40 |
| 111 | dpy30             | protein dpy-30 homolog                                                         | 50,40 |
| 112 | psen2             | presenilin-2                                                                   | 50,41 |
| 113 | srd5a2a           | steroid-5-alpha-reductase alpha polypeptide 2a                                 | 50,42 |
| 114 | jag1a             | protein jagged-1a precursor                                                    | 50,46 |
| 115 | btbd3a            | BTB (POZ) domain containing 3                                                  | 50,55 |
| 116 | esf1              | ESF1 homolog                                                                   | 50,56 |
| 117 | ndufaf5           | NADH dehydrogenase [ubiquinone] 1 alpha subcomplex assembly factor 5 precursor | 50,58 |
| 118 | actr2a            | actin-related protein 2-A                                                      | 50,76 |
| 119 | meis4.1a          | myeloid ecotropic viral integration site 4.1a                                  | 50,84 |
| 120 | etaa1             | Ewing tumor-associated antigen 1                                               | 50,89 |
| 121 | ppp3r1b           | protein phosphatase 3 (formerly 2B) regulatory subunit B alpha isoform b       | 50,91 |
| 122 | cnrip1a           | cannabinoid receptor interacting protein 1a                                    | 50,95 |
| 123 | zgc:165656        | uncharacterized protein LOC100126009                                           | 50,98 |
| 124 | prokr1a           | prokineticin receptor 2                                                        | 51,04 |
| 125 | snrpb2            | U2 small nuclear ribonucleoprotein B''                                         | 51,07 |

|     |                    |                                                                                               |       |
|-----|--------------------|-----------------------------------------------------------------------------------------------|-------|
| 126 | maseh2a            | ribonuclease H2 subunit A                                                                     | 51,08 |
| 127 | prdx2              | peroxiredoxin-2                                                                               | 51,09 |
| 128 | junba              | transcription factor jun-B                                                                    | 51,10 |
| 129 | dand5              | DAN domain family member 5 precursor                                                          | 51,19 |
| 130 | rad23aa            | UV excision repair protein RAD23 homolog A                                                    | 51,48 |
| 131 | mf11a              | ring finger protein 11a                                                                       | 51,50 |
| 132 | asna1              | ATPase asna1                                                                                  | 51,50 |
| 133 | rab3da             | RAB3D member RAS oncogene family a                                                            | 51,54 |
| 134 | pld6               | mitochondrial cardiolipin hydrolase                                                           | 51,57 |
| 135 | cnn1a              | uncharacterized protein LOC567396                                                             | 51,58 |
| 136 | zgc:194101         | uncharacterized protein LOC798684                                                             | 51,80 |
| 137 | si:ch211-217k17.10 | si:ch211-217k17.10                                                                            | 51,81 |
| 138 | si:ch211-217k17.7  | uncharacterized protein LOC559409                                                             | 51,82 |
| 139 | glb1               | beta-galactosidase precursor                                                                  | 51,83 |
| 140 | cldnd1b            | claudin domain containing 1b                                                                  | 51,85 |
| 141 | LOC554386          | uncharacterized protein LOC554386                                                             | 51,85 |
| 142 | acy3.2             | aspartoacylase-2B                                                                             | 51,86 |
| 143 | acy3.1             | aspartoacylase-2A                                                                             | 51,86 |
| 144 | tacr3l             | tachykinin receptor 3-like                                                                    | 51,88 |
| 145 | abca1a             | ATP-binding cassette sub-family A member 1                                                    | 51,93 |
| 146 | aptx               | aprataxin                                                                                     | 52,02 |
| 147 | osbp               | oxysterol-binding protein 1                                                                   | 52,03 |
| 148 | pat1l              | protein PAT1 homolog 1                                                                        | 52,13 |
| 149 | smarca5            | SWI/SNF-related matrix-associated actin-dependent regulator of chromatin subfamily A member 5 | 52,16 |
| 150 | il15               | interleukin 15                                                                                | 52,60 |
| 151 | znf330             | zinc finger protein 330                                                                       | 52,63 |
| 152 | mf150              | RING finger protein 150 precursor                                                             | 52,65 |
| 153 | ucp1               | mitochondrial uncoupling protein 3                                                            | 52,74 |
| 154 | elmod2             | ELMO/CED-12 domain containing 2 precursor                                                     | 52,76 |
| 155 | zgc:66455          | uncharacterized protein LOC393502 precursor                                                   | 52,82 |
| 156 | b3gnt2a            | UDP-GlcNAc:betaGal beta-1 3-N-acetylglucosaminyltransferase 2a                                | 52,84 |
| 157 | commd1             | COMM domain-containing protein 1                                                              | 52,86 |
| 158 | cct4               | T-complex protein 1 subunit delta                                                             | 53,07 |
| 159 | pus10              | pseudouridylate synthase 10                                                                   | 53,08 |
| 160 | crfb17             | interferon gamma receptor 1 precursor                                                         | 53,18 |
| 161 | ltv1               | protein LTV1 homolog                                                                          | 53,21 |
| 162 | capn9              | calpain-9                                                                                     | 53,22 |
| 163 | taf5l              | TAF5-like RNA pol II p300/CBP-associated factor-associated factor 65 kDa subunit              | 53,25 |
| 164 | nup133             | nuclear pore complex protein Nup133                                                           | 53,26 |
| 165 | acta1a             | actin gamma-enteric smooth muscle                                                             | 53,29 |
| 166 | dla                | delta-like protein A                                                                          | 53,35 |
| 167 | tekt4              | tektin-4                                                                                      | 53,94 |
| 168 | sh:ch211-202h22.9  | si:ch211-202h22.9                                                                             | 53,95 |
| 169 | si:ch211-202h22.8  | lipopolysaccharide-induced tumor necrosis factor-alpha factor-like                            | 53,96 |
| 170 | gprc5bb            | G-protein coupled receptor family C group 5 member B-like precursor                           | 54,00 |
| 171 | exosc1             | 3'-5' exoribonuclease CSL4 homolog                                                            | 54,02 |
| 172 | pgam1b             | phosphoglycerate mutase 1b                                                                    | 54,03 |
| 173 | cdc25d             | cell division cycle 25 homolog d                                                              | 54,04 |
| 174 | pi4k2a             | phosphatidylinositol 4-kinase type 2-alpha                                                    | 54,06 |
| 175 | zfyve27            | zinc finger FYVE domain containing 27                                                         | 54,21 |
| 176 | golga7ba           | golgin A7 family member Ba                                                                    | 54,23 |
| 177 | crtac1a            | cartilage acidic protein 1a precursor                                                         | 54,26 |
| 178 | khsrp              | far upstream element-binding protein 2                                                        | 54,28 |
| 179 | zgc:136864         | UPF0390 protein zgc136864                                                                     | 54,33 |
| 180 | vps54              | vacuolar protein sorting-associated protein 54                                                | 54,33 |
| 181 | lgalsla            | galectin-related protein                                                                      | 54,40 |
| 182 | aftpha             | aftiphilin                                                                                    | 54,42 |
| 183 | mb                 | myoglobin                                                                                     | 54,46 |
| 184 | pane1              | centromere protein M                                                                          | 54,48 |
| 185 | zgc:158803         | uncharacterized protein LOC100038767                                                          | 54,49 |
| 186 | mri1               | methylthioribose-1-phosphate isomerase                                                        | 54,51 |
| 187 | nanos3             | nanos homolog 3                                                                               | 54,57 |
| 188 | si:ch211-286b5.5   | guanine nucleotide-binding protein GI/GS/GO gamma-5 subunit                                   | 54,59 |
| 189 | zgc:172106         | uncharacterized protein LOC100136844 precursor                                                | 54,62 |

|     |                   |                                                                             |       |
|-----|-------------------|-----------------------------------------------------------------------------|-------|
| 190 | dnajb1b           | DnaJ (Hsp40) homolog subfamily B member 1                                   | 55,07 |
| 191 | teerb             | trans-2 3-enoyl-CoA reductase                                               | 55,07 |
| 192 | ndufb7            | NADH dehydrogenase [ubiquinone] 1 beta subcomplex subunit 7                 | 55,10 |
| 193 | zgc:136908        | transitional endoplasmic reticulum ATPase-like                              | 55,11 |
| 194 | asf1bb            | histone chaperone asf1b-B                                                   | 55,17 |
| 195 | prkacab           | cAMP-dependent protein kinase catalytic subunit gamma                       | 55,20 |
| 196 | c3a.6             | complement C3-H1-like precursor                                             | 55,36 |
| 197 | c3a.1             | complement component c3a precursor                                          | 55,46 |
| 198 | crb3b             | crumbs homolog 3b                                                           | 55,51 |
| 199 | zgc:65894         | uncharacterized protein LOC335798                                           | 55,55 |
| 200 | c3a.2             | complement component c3a duplicate 2 precursor                              | 55,56 |
| 201 | c3a.3             | complement component c3a duplicate 3 precursor                              | 55,61 |
| 202 | mir722            | microRNA                                                                    | 55,69 |
| 203 | slc25a10          | mitochondrial dicarboxylate carrier                                         | 55,75 |
| 204 | zgc:171452        | uncharacterized protein LOC100126110                                        | 55,79 |
| 205 | sc:d0284          | uncharacterized protein LOC100135433 precursor                              | 56,28 |
| 206 | b3gnt1            | UDP-GlcNAc:betaGal beta-1 3-N-acetylglucosaminyltransferase-like protein 1  | 56,63 |
| 207 | zgc:171470        | uncharacterized protein LOC565848 precursor                                 | 56,78 |
| 208 | tspan34           | uncharacterized protein LOC751731                                           | 56,81 |
| 209 | si:ch211-114113.9 | uncharacterized protein LOC796649                                           | 57,26 |
| 210 | nxn1l             | nucleoredoxin-like protein 1                                                | 57,27 |
| 211 | si:ch211-114113.7 | procollagen galactosyltransferase 1 precursor                               | 57,28 |
| 212 | trim35-1          | uncharacterized protein LOC553197                                           | 57,30 |
| 213 | caspb             | caspase b                                                                   | 57,32 |
| 214 | caspl             | uncharacterized protein LOC566185                                           | 57,37 |
| 215 | zgc:194906        | uncharacterized protein LOC100170839                                        | 57,71 |
| 216 | zgc:174890        | uncharacterized protein LOC792547                                           | 57,80 |
| 217 | zgc:174928        | uncharacterized protein LOC792701                                           | 57,81 |
| 218 | slc27a1b          | solute carrier family 27 (fatty acid transporter) member 1                  | 57,87 |
| 219 | zgc:172091        | uncharacterized protein LOC100136869                                        | 57,89 |
| 220 | sid4              | secreted immunoglobulin domain 4 precursor                                  | 57,97 |
| 221 | tmed1b            | interleukin 1 receptor-like 1 ligand precursor                              | 58,13 |
| 222 | dnm2l             | dynammin-2                                                                  | 58,16 |
| 223 | zgc:171687        | uncharacterized protein LOC100126131 precursor                              | 58,22 |
| 224 | trip10b           | thyroid hormone receptor interactor 10b                                     | 58,22 |
| 225 | pin1              | peptidyl-prolyl cis-trans isomerase NIMA-interacting 1                      | 58,29 |
| 226 | zgc:173915        | uncharacterized protein LOC100126122 precursor                              | 58,31 |
| 227 | mfap4             | microfibrillar-associated protein 4 precursor                               | 58,31 |
| 228 | lpar2b            | lysophosphatidic acid receptor 2b                                           | 58,42 |
| 229 | akap8l            | A-kinase anchor protein 8-like                                              | 58,44 |
| 230 | zgc:153247        | probable glutamate--tRNA ligase mitochondrial precursor                     | 58,45 |
| 231 | eri2              | ERI1 exoribonuclease 2                                                      | 58,48 |
| 232 | thumpd1           | THUMP domain-containing protein 1                                           | 58,48 |
| 233 | zgc:76872         | uncharacterized protein LOC403007                                           | 58,51 |
| 234 | mvb12a            | multivesicular body subunit 12A                                             | 58,53 |
| 235 | olfm2b            | olfactomedin 2 like                                                         | 58,54 |
| 236 | col5a3b           | collagen type V alpha 3b precursor                                          | 58,55 |
| 237 | rdh8b             | retinol dehydrogenase 8b                                                    | 58,59 |
| 238 | parn              | poly(A)-specific ribonuclease PARN                                          | 58,61 |
| 239 | cyp3a65           | cytochrome P450 family 3 subfamily A polypeptide 65                         | 58,63 |
| 240 | zgc:77358         | transcription factor Sp6                                                    | 58,83 |
| 241 | wfikkn1           | WAP kazal immunoglobulin kunitz and NTR domain-containing protein precursor | 58,86 |
